# Supplementary material for: Criteria for evaluating lithium–air batteries in academia to correctly predict their practical performance in industry
Source: Royal Society of Chemistry journal article supplement (doi:10.1039/d1mh01546j), 2021-12-14
Supplement: d1mh01546j1.xlsx [file d1mh01546j1.xlsx]

## Sheet: estimated energy density
carbon electrode		elecrolyte					separator		lithium		current collector		gas-diffusion layer		total weight (mg/cm2)	areal capacity (mAh/cm2)	1st average discharge voltage (V)	Energy density (Wh/kg)	E/C (g/Ah)	Cycle niumber	ref number
details	mass loading (mg/cm2)	details	electrolyte in carbon electrode (mg/cm2)	electrolyte in separator (mg/cm2)	electrolyte volume (uL/cm2) (μl/cm2)	total amount of electrolyte (mg/cm2)	details	mass loading (mg/cm2)	thickness (um)	mass loading (mg/cm2	thickness (um)	mass loading (mg/cm2)	details	mass loading (mg/cm2)
KB	1	0.5M LiTFSI + 0.5M LiNO3 + 0.2M LiBr in TEGDME				8.3	PO	1.08	50	2.67	Ni+Cu mesh	0.9	Ni/Cu mesh	0.9	14.85	3	2.69	543.434	2.76667	6	3
KB	5.4	0.5M LiTFSI + 0.5M LiNO3 + 0.2M LiBr in TEGDME				28.2	PO + LATP	18.52	100	5.34	Ni+Cu mesh	0.9	Ni/Cu mesh	4.9	63.26	4	2.72	171.989	7.05	37	3
SuperP	30	1 M LiTFSI in TEGDME				40.82	PVDF-HFP coated PP	1.08	160	8.544	Cu mesh	1	Al mesh	8.4	89.844	13.45	2.75	411.686	3.03494	2	4
SuperP	30	1 M LiTFSI in TEGDME				40.82	PVDF-HFP coated PP	1.08	160	8.544	Cu mesh	1	Al mesh	8.4	89.844	9.74	2.75	298.128	4.19097	3	4
SuperP	30	1 M LiTFSI in TEGDME				40.82	PVDF-HFP coated PP	1.08	160	8.544	Cu mesh	1	Al mesh	8.4	89.844	6.7	2.75	205.078	6.09254	4	4
SuperP	30	1 M LiTFSI in TEGDME				40.82	PVDF-HFP coated PP	1.08	160	8.544	Cu mesh	1	Al mesh	8.4	89.844	3.38	2.75	103.457	12.0769	8	4
CNT	0.2	gel (LiTFSI-TEGDME-PU)				59.8	Celgard 3501	2		11	Cu mesh	3.6	SUS mesh	3.4	80	12.6	2.5	393.75	4.74603	11	5
CNT	0.2	gel (LiTFSI-TEGDME-PU)				59.8	Celgard 3501	2		11	Cu mesh	3.6	SUS mesh	3.4	80	1.2	2.5	37.5	49.8333	170	5
RuO2 + MnO2 + CNT	7.5	1M LiTFSI in TEGDME	37.5	50		87.5		5.12	500	26.7		7.16		4.11	138.09	10	2.7	195.525	8.75	7	6
RuO2 + MnO2 + CNT	7.5	1M LiTFSI in TEGDME	37.5	50		87.5		5.12	500	26.7		7.16		4.11	138.09	4.5	2.5	81.4686	19.4444	40	6
RuO2 + MnO2 + CNT	7.5	1M LiTFSI in TEGDME	37.5	50		87.5		5.12	500	26.7		7.16		4.11	138.09	3	2.5	54.3124	29.1667	45	6
RuO2 + MnO2 + CNT	7.5	1M LiTFSI in TEGDME	37.5	50		87.5	Glass fiber (GF/D )	5.12	500	26.7		7.16		4.11	138.09	1.5	2.5	27.1562	58.3333	315	6
CNT	0.2	1M LiTFSI in DMSO			127.389	140.127	Glass fiber (Waterman)	5.12	400	21.36		7.16		4.11	178.077	0.2	2.72	3.05485	700.637	165	11
MoS2	0.4	1M LiTFSI in TEGDME	2	50		52	Glass fiber	5.12		2.67		7.16		4.11	71.46	1	2.7	37.7834	52	190	12
Graphene	1.5	1M LiTFSI in TEGDME	7.5	50		57.5	Glass fiber( Whatman GF/D)	5.12		2.67		7.16		4.11	78.06	0.5	2.68	17.1663	115	100	13
Graphene	1.5	1M LiTFSI in TEGDME	7.5	50		57.5	Glass fiber( Whatman GF/D)	5.12		2.67		7.16		4.11	78.06	0.25	2.68	8.58314	230	400	13
NiCo2S4	0.65	1M LiTFSI in TEGDME	3.25	50		53.25	Glass fiber( Whatman GF/D)	5.12		2.67		7.16	carbon paper	4.11	72.96	0.65	2.73	24.3215	81.9231	300	14
CNT	0.0141	0.318 g LiTfO and 0.0134 g LiI in 2.018 g TEGDME	0.0705	50	76.9231	84.6154	Glass fiber( Whatman GF/A)	5.12		2.67		7.16		4.11	103.689	0.0141	2.7	0.367154	6001.09	260	15
SuperP + Ru + CNT	0.45	1M Triflate in TEGDME with 5 wt% TEOS	2.25	50		52.25	Glass fiber	5.12		2.67		7.16		4.11	71.76	0.45	2.7	16.9314	116.111	144	16
MnOOH + SuperP	0.5	1 M LiTriflate in TEGDME	2.5	50		52.5	SHCPE	5.12		2.67		7.16		4.11	72.06	0.25	2.6	9.02026	210	180	17
CNT	1	1M LiTFSI in TEGDME			90	99	Glass fiber( Whatman GF/D)	5.12	450	10		7.16		4.11	126.39	1	2.7	21.3624	99	90	18
CNT	0.7	1M LiTFSI in DMSO with 20mM BA			40	44	Glass fiber( Whatman GF/C)	5.12	500	26.7		7.16		4.11	87.79	0.7	2.7	21.5286	62.8571	146	19
Mo2C	0.4	1 M LiClO4 in DMSO	2	50		52	Glass fiber( Whatman GF/D)	5.12		2.67		7.16		4.11	71.46	0.2	2.72	7.61265	260	200	20
Reduced graphene oxide	1	1M LiTriflate in TEGDME	5	50		55	Glass fiber( Whatman GF/A)	5.12	200	10.68		7.16	GDL (TGP-H-060, Toray)	4.11	83.07	0.5	2.75	16.5523	110	109	21
MoS2	0.1	0.1 M LiTFSI in EMIM-BF4:DMSO (25:75 volume ratio)			23.3	25.63		5.12	250	13.35		7.16	conductive substrate	4.11	55.47	0.05	2.8	2.52389	512.6	550	22
MnO2 + CNT	6.66	1M LiTFSI in TEGDME with 0.1M TEMPO	33.3	50		83.3	Glass fiber( Whatman GF/C)	5.12	200	10.68		7.16		4.11	117.03	2	2.7	46.142	41.65	23	23
Graphene	0.25	1 M LiTFSI in TEGDME			135	148.5	Glass fiber	5.12	450	24.03		7.16		4.11	189.17	0.25	2.74	3.62108	594	50	24
Graphene	5	1 M LiTFSI in TEGDME			135	148.5	Glass fiber	5.12		2.67		7.16		4.11	172.56	2	2.7	31.2935	74.25	15	24
Graphene	10	1 M LiTFSI in TEGDME			135	148.5	Glass fiber	5.12		2.67		7.16		4.11	177.56	2	2.7	30.4123	74.25	20	24
CNT	0.5	1 M LiClO4 in TEGDME with 0.05 M LiI	2.5	50		52.5	PU + GF/D whatman	5.12	600	32.04		7.16	GDL (TGP-H-090)	6.165	103.485	0.3	2.65	7.68227	175	200	25
Graphene	1	1M LiTriflate in TEGDME	5	50		55	Glass fiber( Whatman GF/A)	5.12	200	10.68		7.16	GDL (TGP-H-060, Toray)	4.11	83.07	0.5	2.75	16.5523	110	40	26
Graphene	1	1M LiTriflate in TEGDME	5	50		55	Glass fiber( Whatman GF/A)	5.12	200	10.68		7.16	GDL (TGP-H-060, Toray)	4.11	83.07	0.1	2.7	3.25027	550	170	26
Reduced graphene oxide	0.1	1 M LiTriflate in DME	0.5	50		50.5	Glass fiber( Whatman GF/C)	5.12		2.67		7.16	GDL (Toray)	4.11	69.66	0.5	2.7	19.3798	101	237	27
Boron carbide	1.2	1M LiTFSI in TEGDME	6	50		56	Glass fiber	5.12		2.67		7.16		4.11	76.26	0.3	2.7	10.6216	186.667	160	28
Graphene	2	1 M LiTriflate in DME	10	50		60		5.12		2.67		7.16		4.11	81.06	0.4	2.67	13.1754	150	105	29
Graphene	2	1 M LiTriflate in DME	10	50		60		5.12		2.67		7.16		4.11	81.06	2	2.35	57.9817	30	18	29
Reduced graphene oxide	0.1	0.05 M LiI + 0.25 M LiTFSI in DME			100	110	Glass fiber (Waterman)	5.12	380	20.292		7.16		4.11	146.782	0.1	2.75	1.87353	1100	2000	30
Reduced graphene oxide	0.1	0.05 M LiI + 0.25 M LiTFSI in DME			100	110	Glass fiber (Waterman)	5.12	380	20.292		7.16		4.11	146.782	0.1	2.75	1.87353	1100	100	30
Reduced graphene oxide	0.1	0.05 M LiI + 0.25 M LiTFSI in DME			100	110	Glass fiber (Waterman)	5.12	380	20.292		7.16		4.11	146.782	0.1	2.7	1.83946	1100	300	30
